# Supplementary material for: Photocatalytic and photoelectrocatalytic degradation of perfluorooctanoic acid by immobilised ZnO nanoparticles using electrophoretic deposition
Source: Royal Society of Chemistry journal article supplement (doi:10.1039/d3en00241a), 2023-01-01
Supplement: d3en00241a1.pdf [file d3en00241a1.pdf]

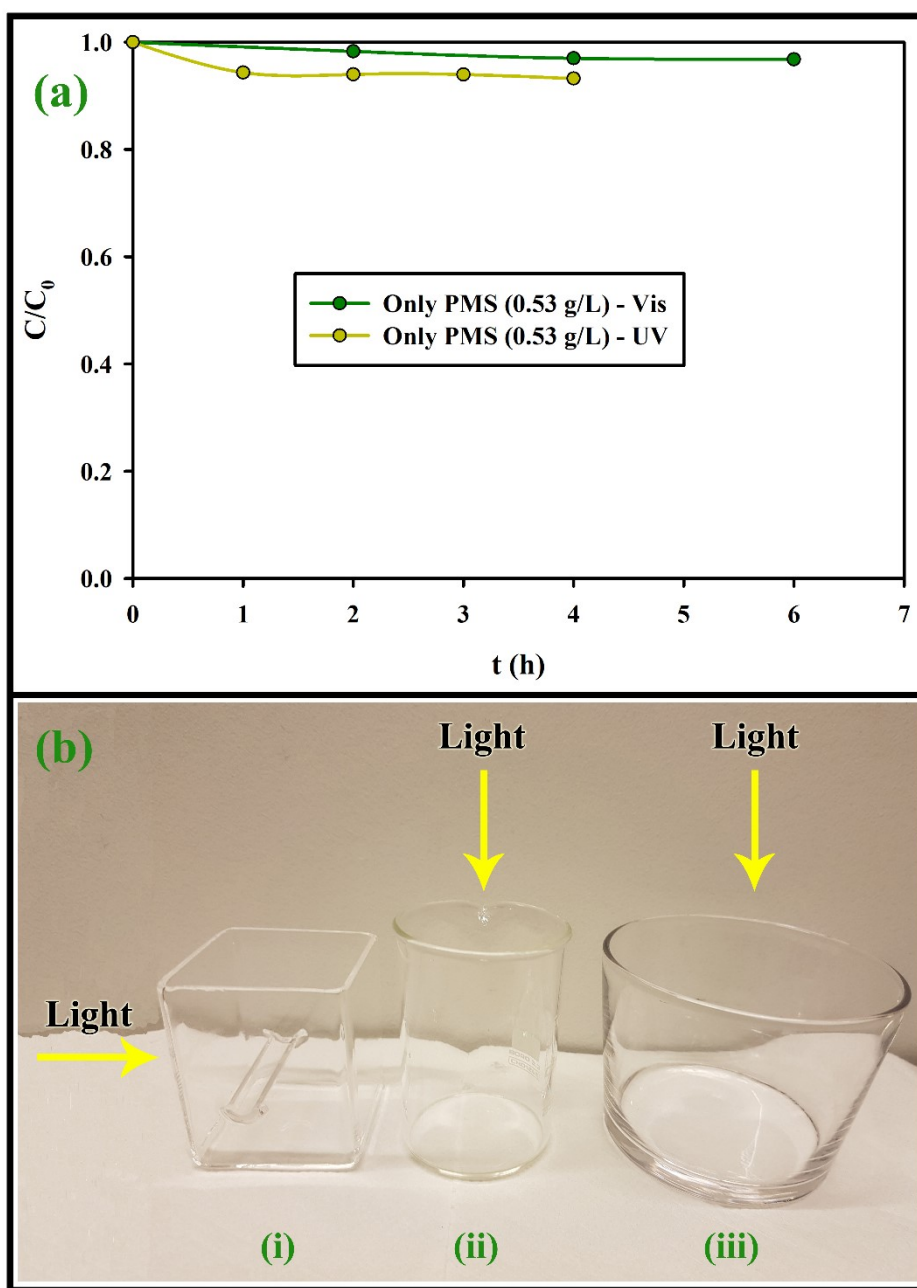

Figure S1. (a) Effect of PMS on PFOA degradation in the absence of ZnO under UV and visible light irradiation. (b) Different vessels used for evaluation of the photocatalytic/photoelectrocatalytic degradation of PFOA (i: ZnO films, ii: suspended ZnO nanoparticles, iii: PMS (in the absence of ZnO)).

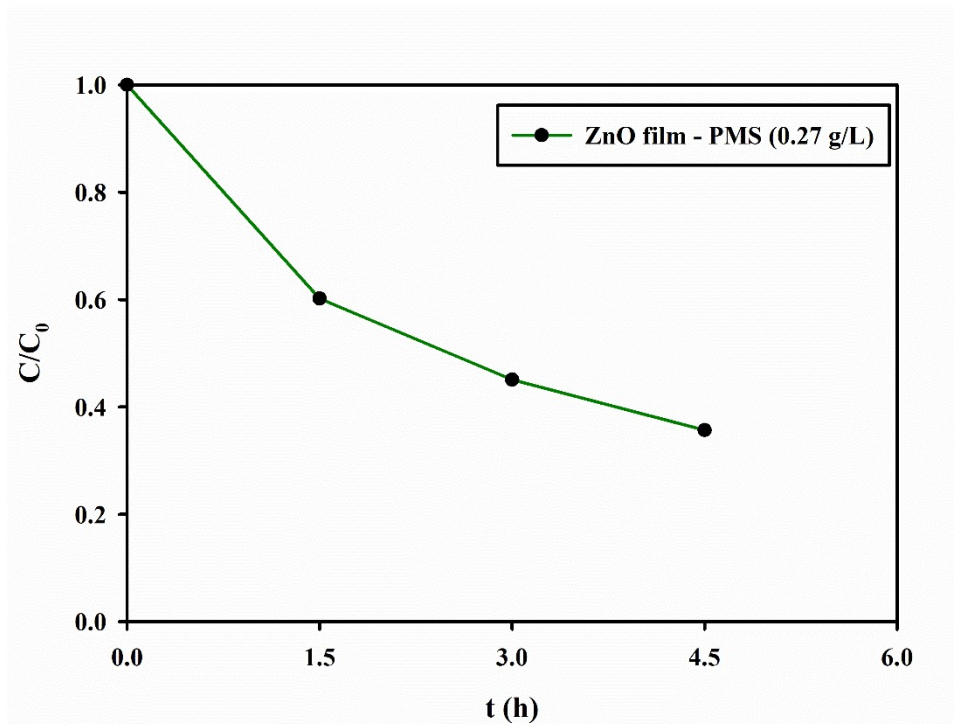

Figure S2. Effect of the irradiation time on the photocatalytic PFOA degradation over the ZnO electrode with the addition of PMS ( $\sim 0.27 \text{ g L}^{-1}$ ) under UV irradiation.

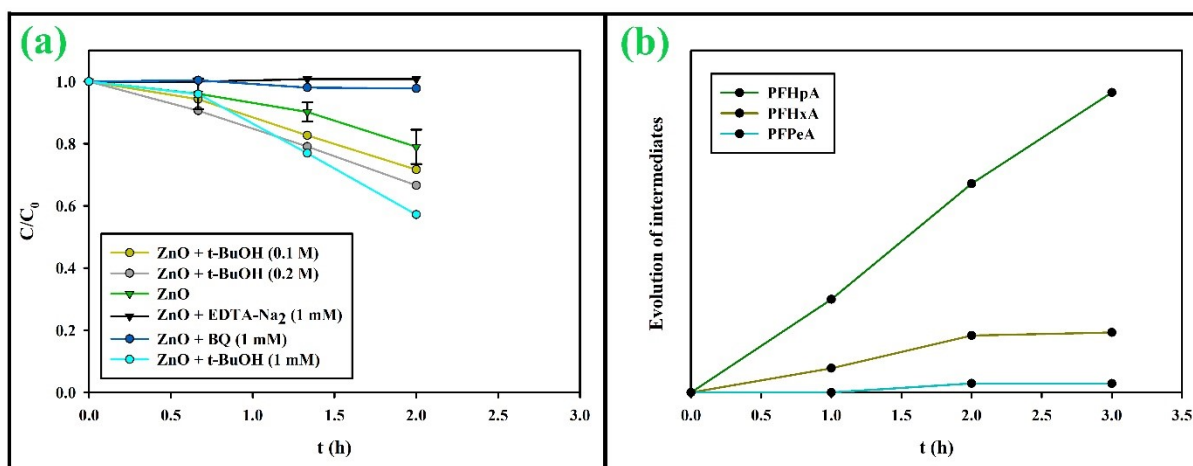

Figure S3. (a) Effects of the scavengers on PFOA ( $53 \text{ mg L}^{-1}$ ) photocatalytic degradation under UV irradiation using suspended ZnO nanoparticles ( $0.53 \text{ g L}^{-1}$ ). (b) Evolution of intermediates during the photocatalysis of PFOA ( $53 \text{ mg L}^{-1}$ ) under UV irradiation using suspended ZnO nanoparticles ( $0.53 \text{ g L}^{-1}$ ) with the addition of PMS ( $0.53 \text{ g L}^{-1}$ ).

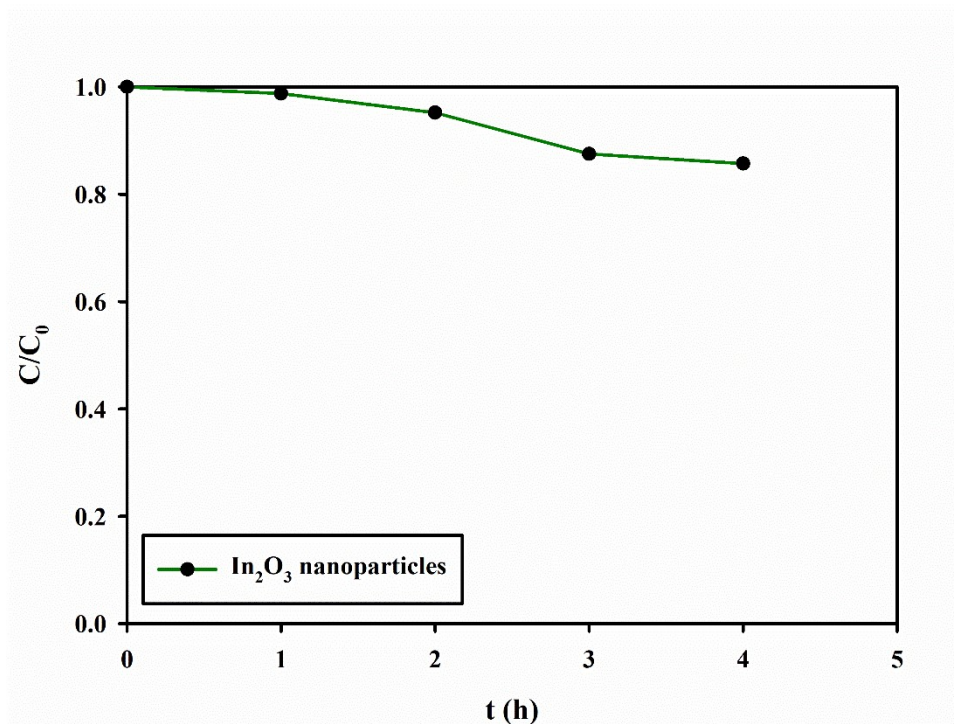

Figure S4. Photocatalytic degradation of PFOA ( $\sim 53 \text{ mg L}^{-1}$ ) using suspended  $\text{In}_2\text{O}_3$  nanoparticles ( $\sim 0.53 \text{ g L}^{-1}$ ) under UV irradiation.
